# Supplementary material
Source: PubMed Central journal article supplement (PMC7342176)

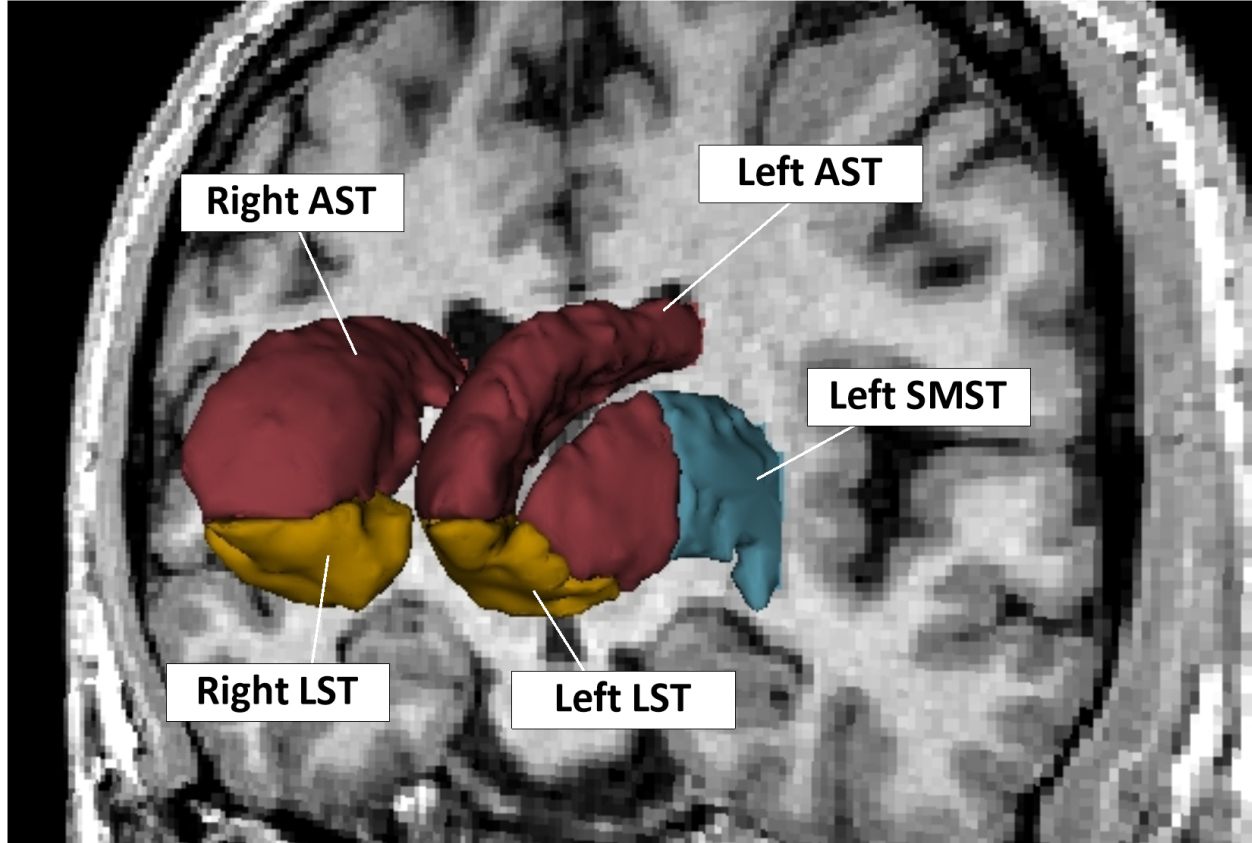

Supplement: sbz129_suppl_supplementary_figure_s1.pdf [file sbz129_suppl_supplementary_figure_s1.pdf]

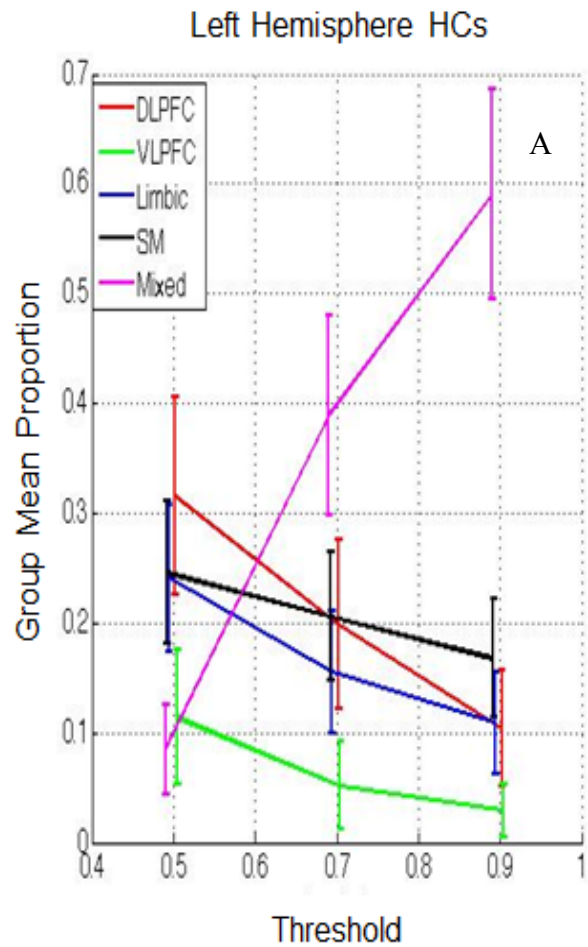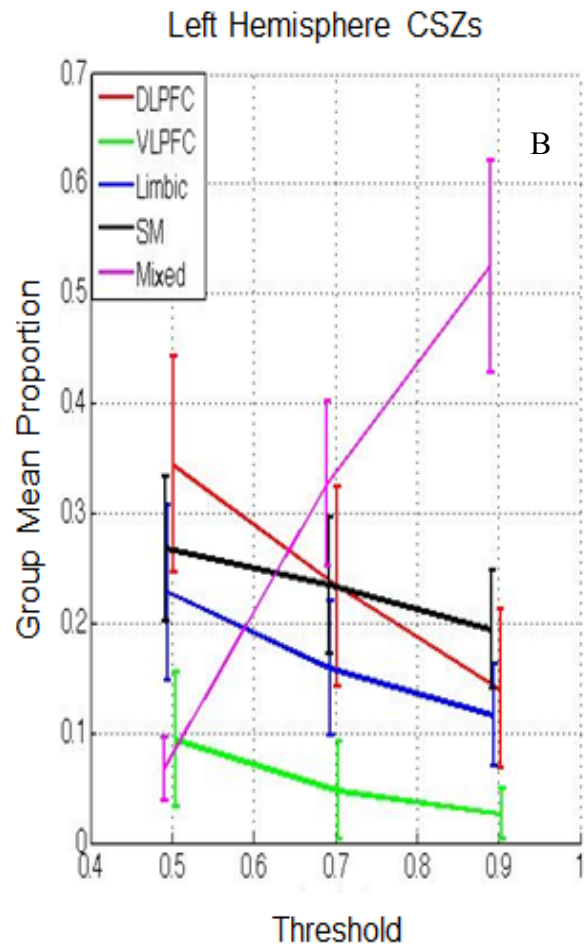

Supplement: sbz129_suppl_supplementary_figure_s2.pdf [file sbz129_suppl_supplementary_figure_s2.pdf]
